# Supplementary material
Source: publisher figshare collection journal article supplement (https://rs.figshare.com/ndownloader/files/32069851)
Supplement: Supplementary file 1 [file 32069851]

## Sheet: Ark1
Species	Date (dd-mm-yyyy)	Test time	Site	# of individuals collected
Nysius caledoniae	2019-02-15	11:59:00	Site 1	38
Nysius caledoniae	2019-02-15	15:55:00	Site 1	38
Nysius caledoniae	2019-02-15	20:00:00	Site 1	39
Nysius caledoniae	2019-02-17	08:07:00	Site 1	33
Nysius caledoniae	2019-02-17	11:57:00	Site 1	39
Nysius caledoniae	2019-02-17	16:00:00	Site 1	37
Nysius caledoniae	2019-02-17	20:05:00	Site 1	38
Nysius caledoniae	2019-02-20	08:39:00	Site 1	36
Nysius caledoniae	2019-02-20	12:56:00	Site 1	38
Nysius caledoniae	2019-02-20	16:41:00	Site 1	40
Nysius caledoniae	2019-02-20	20:28:00	Site 1	38
Nysius caledoniae	2019-02-25	08:30:00	Site 1	38
Nysius caledoniae	2019-02-25	12:22:00	Site 1	40
Nysius caledoniae	2019-02-25	16:25:00	Site 1	40
Nysius caledoniae	2019-02-25	20:34:00	Site 1	36
Nysius caledoniae	2019-03-02	08:14:00	Site 1	40
Nysius caledoniae	2019-03-02	12:05:00	Site 1	34
Nysius caledoniae	2019-03-02	16:06:00	Site 1	34
Nysius caledoniae	2019-03-02	20:18:00	Site 1	37
Nysius caledoniae	2019-03-04	08:39:00	Site 1	30
Nysius caledoniae	2019-03-04	12:05:00	Site 1	30
Nysius caledoniae	2019-03-04	16:09:00	Site 1	28
Nysius caledoniae	2019-03-04	19:45:00	Site 1	30
Nysius caledoniae	2019-03-05	08:21:00	Site 1	30
Nysius caledoniae	2019-03-05	12:17:00	Site 1	30
Nysius caledoniae	2019-03-05	16:16:00	Site 1	29
Nysius caledoniae	2019-03-05	20:19:00	Site 1	30
Nysius caledoniae	2019-03-07	09:48:00	Site 1	30
Nysius caledoniae	2019-03-07	12:06:00	Site 1	30
Nysius caledoniae	2019-03-07	16:03:00	Site 1	30
Nysius caledoniae	2019-03-07	20:01:00	Site 1	29
Stenophyella macreta	2019-03-22	10:05:00	Site 2	30
Stenophyella macreta	2019-03-22	13:48:00	Site 2	29
Stenophyella macreta	2019-03-22	16:48:00	Site 2	30
Stenophyella macreta	2019-03-22	20:49:00	Site 2	30
Stenophyella macreta	2019-03-23	16:47:00	Site 2	29
Stenophyella macreta	2019-03-23	20:21:00	Site 2	30
Stenophyella macreta	2019-03-24	09:44:00	Site 2	29
Stenophyella macreta	2019-03-24	12:46:00	Site 2	29
Stenophyella macreta	2019-03-24	16:16:00	Site 2	30
Stenophyella macreta	2019-03-24	20:25:00	Site 2	30
Stenophyella macreta	2019-03-27	10:39:00	Site 2	30
Stenophyella macreta	2019-03-27	14:00:00	Site 2	29
Stenophyella macreta	2019-03-27	17:24:00	Site 2	29
Stenophyella macreta	2019-04-16	08:47:00	Site 2	29
Stenophyella macreta	2019-04-16	12:45:00	Site 2	22
Stenophyella macreta	2019-04-16	16:36:00	Site 2	25
Stenophyella macreta	2019-04-16	19:49:00	Site 2	15
Uroleucon sonchi	2019-03-26	17:16:00	Site 3	20
Uroleucon sonchi	2019-03-26	12:14:00	Site 3	20
Uroleucon sonchi	2019-03-26	08:42:00	Site 3	19
Uroleucon sonchi	2019-03-26	20:10:00	Site 3	20
Uroleucon sonchi	2019-03-28	08:24:00	Site 3	20
Uroleucon sonchi	2019-03-28	12:18:00	Site 3	20
Uroleucon sonchi	2019-03-28	15:52:00	Site 3	20
Uroleucon sonchi	2019-03-28	20:10:00	Site 3	19
Uroleucon sonchi	2019-03-29	08:33:00	Site 3	20
Uroleucon sonchi	2019-03-29	12:07:00	Site 3	20
Uroleucon sonchi	2019-03-29	16:15:00	Site 3	20
Uroleucon sonchi	2019-03-29	20:17:00	Site 3	20
Uroleucon sonchi	2019-04-01	13:38:00	Site 3	20
Uroleucon sonchi	2019-04-01	16:37:00	Site 3	19
Uroleucon sonchi	2019-04-01	20:34:00	Site 3	19
Uroleucon sonchi	2019-04-15	08:42:00	Site 3	25
Uroleucon sonchi	2019-04-15	12:27:00	Site 3	20
Uroleucon sonchi	2019-04-15	16:08:00	Site 3	21
Uroleucon sonchi	2019-04-15	20:15:00	Site 3	20
Aphis nerii	2019-04-01	13:21:00	Site 3	19
Aphis nerii	2019-04-01	16:20:00	Site 3	20
Aphis nerii	2019-04-01	20:06:00	Site 3	19
Aphis nerii	2019-04-02	08:38:00	Site 3	20
Aphis nerii	2019-04-02	12:36:00	Site 3	20
Aphis nerii	2019-04-02	15:55:00	Site 3	20
Aphis nerii	2019-04-02	19:51:00	Site 3	19
Hyperomyzus lactucae	2019-04-04	08:07:00	Site 3	13
Hyperomyzus lactucae	2019-04-04	12:32:00	Site 3	12
Hyperomyzus lactucae	2019-04-04	16:34:00	Site 3	15
Hyperomyzus lactucae	2019-04-04	20:08:00	Site 3	15
Hyperomyzus lactucae	2019-04-05	08:49:00	Site 3	14
Hyperomyzus lactucae	2019-04-05	12:43:00	Site 3	19
Hyperomyzus lactucae	2019-04-05	16:40:00	Site 3	14
Hyperomyzus lactucae	2019-04-05	20:49:00	Site 3	15
Hyperomyzus lactucae	2019-04-07	10:11:00	Site 3	14
Hyperomyzus lactucae	2019-04-07	12:35:00	Site 3	15
Hyperomyzus lactucae	2019-04-07	16:32:00	Site 3	11
Hyperomyzus lactucae	2019-04-07	20:29:00	Site 3	15
Hyperomyzus lactucae	2019-04-15	09:00:00	Site 3	22
Hyperomyzus lactucae	2019-04-15	12:48:00	Site 3	22
Hyperomyzus lactucae	2019-04-15	16:22:00	Site 3	19
Hyperomyzus lactucae	2019-04-15	20:29:00	Site 3	18
Drosophila melanogaster	2019-04-09	2019-04-09 09:35:00	Site 2	30
Drosophila melanogaster	2019-04-09	2019-04-09 12:32:00	Site 2	39
Drosophila melanogaster	2019-04-09	2019-04-09 16:14:00	Site 2	30
Drosophila melanogaster	2019-04-09	2019-04-09 20:32:00	Site 2	29
Drosophila melanogaster	2019-04-16	2019-04-16 09:30:00	Site 2	40
Drosophila melanogaster	2019-04-16	2019-04-16 13:32:00	Site 2	41
Drosophila melanogaster	2019-04-16	2019-04-16 17:22:00	Site 2	39
Drosophila melanogaster	2019-04-16	2019-04-16 21:01:00	Site 2	38
Drosophila melanogaster	2019-04-17	2019-04-17 08:44:00	Site 2	40
Drosophila melanogaster	2019-04-17	2019-04-17 12:04:00	Site 2	40
Drosophila melanogaster	2019-04-17	2019-04-17 17:47:00	Site 2	39
Drosophila melanogaster	2019-04-17	2019-04-17 21:34:00	Site 2	39
Drosophila melanogaster	2019-04-25	2019-04-25 08:53:00	Site 2	41
Drosophila melanogaster	2019-04-25	2019-04-25 12:40:00	Site 2	40
Drosophila melanogaster	2019-04-25	2019-04-25 16:52:00	Site 2	38
Drosophila melanogaster	2019-04-25	2019-04-25 20:38:00	Site 2	38
Drosophila melanogaster	2019-05-15	2019-05-15 08:52:00	Site 2	41
Drosophila melanogaster	2019-05-15	2019-05-15 11:55:00	Site 2	40
Drosophila melanogaster	2019-05-15	2019-05-15 16:17:00	Site 2	38
Drosophila melanogaster	2019-05-15	2019-05-15 20:32:00	Site 2	41
Drosophila melanogaster	2019-04-11	2019-04-11 08:52:00	Site 2	39
Drosophila melanogaster	2019-04-11	2019-04-11 12:24:00	Site 2	40
Drosophila melanogaster	2019-04-11	2019-04-11 16:25:00	Site 2	40
Drosophila melanogaster	2019-04-11	2019-04-11 20:43:00	Site 2	40
Psyllidae sp.	2019-04-23	13:24:00	Site 2	20
Psyllidae sp.	2019-04-23	17:41:00	Site 2	19
Psyllidae sp.	2019-05-06	09:03:00	Site 2	26
Psyllidae sp.	2019-05-06	12:31:00	Site 2	32
Psyllidae sp.	2019-05-06	16:23:00	Site 2	31
Psyllidae sp.	2019-05-06	20:56:00	Site 2	29
Psyllidae sp.	2019-05-07	09:12:00	Site 2	30
Psyllidae sp.	2019-05-07	12:36:00	Site 2	29
Psyllidae sp.	2019-05-07	17:54:00	Site 2	28
Psyllidae sp.	2019-05-17	12:33:00	Site 2	33
Psyllidae sp.	2019-05-17	17:07:00	Site 2	19
Psyllidae sp.	2019-05-18	13:11:00	Site 2	23
Psyllidae sp.	2019-05-23	13:10:00	Site 2	30
Pseudopachybrachius guttus	2019-06-05	2019-06-05 08:47:00	Site 4	38
Pseudopachybrachius guttus	2019-06-05	2019-06-05 12:25:00	Site 4	38
Pseudopachybrachius guttus	2019-06-05	2019-06-05 16:26:00	Site 4	38
Pseudopachybrachius guttus	2019-06-05	2019-06-05 20:32:00	Site 4	38
Pseudopachybrachius guttus	2019-06-06	2019-06-06 08:38:00	Site 4	38
Pseudopachybrachius guttus	2019-06-06	2019-06-06 12:37:00	Site 4	36
Pseudopachybrachius guttus	2019-06-06	2019-06-06 17:00:00	Site 4	40
Pseudopachybrachius guttus	2019-06-06	2019-06-06 20:05:00	Site 4	39
Pseudopachybrachius guttus	2019-06-07	2019-06-07 08:12:00	Site 4	40
Pseudopachybrachius guttus	2019-06-08	2019-06-08 10:30:00	Site 4	40
Pseudopachybrachius guttus	2019-06-08	2019-06-08 13:46:00	Site 4	40
Pseudopachybrachius guttus	2019-06-08	2019-06-08 17:33:00	Site 4	40
Pseudopachybrachius guttus	2019-06-08	2019-06-08 20:38:00	Site 4	40
Pseudopachybrachius guttus	2019-06-09	2019-06-09 10:26:00	Site 4	39
Pseudopachybrachius guttus	2019-06-09	2019-06-09 15:14:00	Site 4	38
Pseudopachybrachius guttus	2019-06-09	2019-06-09 19:07:00	Site 4	40
Pseudopachybrachius guttus	2019-06-13	2019-06-13 08:39:00	Site 4	40
Pseudopachybrachius guttus	2019-06-13	2019-06-13 12:22:00	Site 4	40
Pseudopachybrachius guttus	2019-06-13	2019-06-13 16:11:00	Site 4	40
Pseudopachybrachius guttus	2019-06-13	2019-06-13 20:08:00	Site 4	39
Pseudopachybrachius guttus	2019-06-14	2019-06-14 08:44:00	Site 4	40
Pseudopachybrachius guttus	2019-06-14	2019-06-14 12:35:00	Site 4	42
Pseudopachybrachius guttus	2019-06-14	2019-06-14 16:41:00	Site 4	36
Pseudopachybrachius guttus	2019-06-14	2019-06-14 20:19:00	Site 4	40
Cicadellidae sp.	2019-06-05	09:25:00	Site 4	39
Cicadellidae sp.	2019-06-05	13:00:00	Site 4	40
Cicadellidae sp.	2019-06-05	17:12:00	Site 4	39
Cicadellidae sp.	2019-06-05	21:13:00	Site 4	39
Cicadellidae sp.	2019-06-06	09:25:00	Site 4	35
Cicadellidae sp.	2019-06-06	13:15:00	Site 4	36
Cicadellidae sp.	2019-06-06	17:36:00	Site 4	38
Cicadellidae sp.	2019-06-06	20:45:00	Site 4	38
Cicadellidae sp.	2019-06-07	08:56:00	Site 4	36
Cicadellidae sp.	2019-06-08	14:23:00	Site 4	37
Cicadellidae sp.	2019-06-09	11:08:00	Site 4	39
Cicadellidae sp.	2019-06-09	16:00:00	Site 4	37
Cicadellidae sp.	2019-06-09	19:51:00	Site 4	34
Cicadellidae sp.	2019-06-19	08:30:00	Site 4	40
Cicadellidae sp.	2019-06-19	11:59:00	Site 4	38
Cicadellidae sp.	2019-06-19	16:28:00	Site 4	40
Cicadellidae sp.	2019-06-19	19:59:00	Site 4	39
Cicadellidae sp.	2019-06-20	08:00:00	Site 4	40
Cicadellidae sp.	2019-06-20	12:00:00	Site 4	40
Cicadellidae sp.	2019-06-20	15:54:00	Site 4	37
Cicadellidae sp.	2019-06-20	19:50:00	Site 4	38
Oecophylla smaragdina	2019-06-11	10:11:00	Site 4	30
Oecophylla smaragdina	2019-06-11	14:36:00	Site 4	30
Oecophylla smaragdina	2019-06-11	18:39:00	Site 4	30
Oecophylla smaragdina	2019-06-11	21:34:00	Site 4	28
Oecophylla smaragdina	2019-06-19	09:49:00	Site 4	29
Oecophylla smaragdina	2019-06-19	13:14:00	Site 4	30
Oecophylla smaragdina	2019-06-19	17:42:00	Site 4	30
Oecophylla smaragdina	2019-06-19	21:13:00	Site 4	26
Oecophylla smaragdina	2019-06-20	09:20:00	Site 4	29
Oecophylla smaragdina	2019-06-20	13:30:00	Site 4	30
Oecophylla smaragdina	2019-06-20	17:07:00	Site 4	30
Oecophylla smaragdina	2019-06-20	21:04:00	Site 4	29
Oecophylla smaragdina	2019-06-24	09:20:00	Site 4	29
Oecophylla smaragdina	2019-06-24	11:44:00	Site 4	30
Oecophylla smaragdina	2019-06-24	15:56:00	Site 4	30
Oecophylla smaragdina	2019-06-24	19:53:00	Site 4	31
Oecophylla smaragdina	2019-06-25	07:56:00	Site 4	30
Oecophylla smaragdina	2019-06-25	11:50:00	Site 4	30
Oecophylla smaragdina	2019-06-25	15:52:00	Site 4	30
Oecophylla smaragdina	2019-06-25	19:41:00	Site 4	31
Scaptodrosophila novoguineensis	2019-06-16	2019-06-16 08:58:00	Site 5/6	39
Scaptodrosophila novoguineensis	2019-06-16	2019-06-16 13:11:00	Site 5/6	38
Scaptodrosophila novoguineensis	2019-06-16	2019-06-16 17:11:00	Site 5/6	40
Scaptodrosophila novoguineensis	2019-06-16	2019-06-16 21:21:00	Site 5/6	37
Scaptodrosophila novoguineensis	2019-06-17	2019-06-17 09:00:00	Site 5/6	40
Scaptodrosophila novoguineensis	2019-06-17	2019-06-17 13:06:00	Site 5/6	39
Scaptodrosophila novoguineensis	2019-06-17	2019-06-17 17:07:00	Site 5/6	39
Scaptodrosophila novoguineensis	2019-06-17	2019-06-17 20:58:00	Site 5/6	40
Scaptodrosophila novoguineensis	2019-06-18	2019-06-18 09:16:00	Site 5/6	39
Scaptodrosophila novoguineensis	2019-06-18	2019-06-18 12:44:00	Site 5/6	40
Scaptodrosophila novoguineensis	2019-06-18	2019-06-18 16:58:00	Site 5/6	40
Scaptodrosophila novoguineensis	2019-06-18	2019-06-18 21:04:00	Site 5/6	40
Scaptodrosophila novoguineensis	2019-06-21	2019-06-21 09:05:00	Site 5/6	39
Scaptodrosophila novoguineensis	2019-06-21	2019-06-21 12:56:00	Site 5/6	39
Scaptodrosophila novoguineensis	2019-06-21	2019-06-21 17:18:00	Site 5/6	40
Scaptodrosophila novoguineensis	2019-06-21	2019-06-21 21:07:00	Site 5/6	40
Scaptodrosophila novoguineensis	2019-06-22	2019-06-22 09:00:00	Site 5/6	39
Scaptodrosophila novoguineensis	2019-06-22	2019-06-22 12:58:00	Site 5/6	39
Scaptodrosophila novoguineensis	2019-06-22	2019-06-22 17:05:00	Site 5/6	39
Scaptodrosophila novoguineensis	2019-06-22	2019-06-22 21:11:00	Site 5/6	40
Scaptodrosophila novoguineensis	2019-06-26	2019-06-26 09:05:00	Site 5/6	40
Scaptodrosophila novoguineensis	2019-06-26	2019-06-26 13:13:00	Site 5/6	40
Scaptodrosophila novoguineensis	2019-06-26	2019-06-26 17:05:00	Site 5/6	40
Scaptodrosophila novoguineensis	2019-06-26	2019-06-26 20:34:00	Site 5/6	40
Drosophila rubida	2019-06-16	2019-06-16 08:02:00	Site 5/6	40
Drosophila rubida	2019-06-16	2019-06-16 12:04:00	Site 5/6	40
Drosophila rubida	2019-06-16	2019-06-16 15:59:00	Site 5/6	40
Drosophila rubida	2019-06-16	2019-06-16 20:28:00	Site 5/6	40
Drosophila rubida	2019-06-17	2019-06-17 08:00:00	Site 5/6	39
Drosophila rubida	2019-06-17	2019-06-17 12:05:00	Site 5/6	40
Drosophila rubida	2019-06-17	2019-06-17 15:58:00	Site 5/6	39
Drosophila rubida	2019-06-17	2019-06-17 20:05:00	Site 5/6	40
Drosophila rubida	2019-06-18	2019-06-18 08:07:00	Site 5/6	40
Drosophila rubida	2019-06-18	2019-06-18 11:42:00	Site 5/6	40
Drosophila rubida	2019-06-18	2019-06-18 16:02:00	Site 5/6	39
Drosophila rubida	2019-06-18	2019-06-18 19:54:00	Site 5/6	40
Drosophila rubida	2019-06-21	2019-06-21 08:00:00	Site 5/6	40
Drosophila rubida	2019-06-21	2019-06-21 11:57:00	Site 5/6	39
Drosophila rubida	2019-06-21	2019-06-21 16:11:00	Site 5/6	40
Drosophila rubida	2019-06-21	2019-06-21 20:00:00	Site 5/6	40
Drosophila rubida	2019-06-22	2019-06-22 08:00:00	Site 5/6	40
Drosophila rubida	2019-06-22	2019-06-22 11:52:00	Site 5/6	40
Drosophila rubida	2019-06-22	2019-06-22 15:58:00	Site 5/6	40
Drosophila rubida	2019-06-22	2019-06-22 20:00:00	Site 5/6	39
Drosophila rubida	2019-06-26	2019-06-26 07:59:00	Site 5/6	40
Drosophila rubida	2019-06-26	2019-06-26 11:55:00	Site 5/6	39
Drosophila rubida	2019-06-26	2019-06-26 15:59:00	Site 5/6	40
Drosophila rubida	2019-06-26	2019-06-26 19:27:00	Site 5/6	40
